# Supplementary material
Source: PubMed Central journal article supplement (PMC1691657)
Supplement: 15209111s01.pdf [file 15209111s01.pdf]

This is an electronic appendix to the paper by de Groot & van Leeuwen 2004 Evidence for an elastic projection mechanism in the chameleon tongue. *Proc. R. Soc. Lond. B* **271**, 761-770. (DOI 10.1098/rspb.2003.2637.)

Electronic appendices are refereed with the text. However, no attempt is made to impose a uniform editorial style on the electronic appendices.

Table 1. Symbols and definitions.

| symbol                                               | definition                                                                                           | unit                       |
|------------------------------------------------------|------------------------------------------------------------------------------------------------------|----------------------------|
| $a_{\text{tongue}}$                                  | forward acceleration of the soft tissue of the tongue                                                | $\text{m s}^{-2}$          |
| $(a_{\text{tongue}} v_{\text{tongue}})_{\text{max}}$ | maximum value during tongue projection of product $a_{\text{tongue}} v_{\text{tongue}}$              | $\text{m}^2 \text{s}^{-3}$ |
| $m_{\text{tongue}}$                                  | mass of the soft tissue of the tongue                                                                | kg                         |
| $P_{\text{ent}}$                                     | power transmitted to the tongue via the entoglossal process                                          | W                          |
| $P_{\text{ent}}^*$                                   | power transmitted to the tongue via the entoglossal process normalized relative to peak tongue power |                            |
| $P_{\text{s}}$                                       | power released by the spring                                                                         | W                          |
| $P_{\text{s}}^*$                                     | power released by the spring normalized relative to peak tongue power                                |                            |
| $P_{\text{tot}}$                                     | total power delivered to the soft tissue of the tongue                                               | W                          |
| $v_{\text{ent}}$                                     | forward velocity of the entoglossal process                                                          | $\text{m s}^{-1}$          |
| $v_{\text{max}}$                                     | peak velocity of the tongue                                                                          | $\text{m s}^{-1}$          |
| $v_{\text{max}}^*$                                   | peak velocity of the tongue if the hyobranchium transmitted zero energy to the tongue                | $\text{m s}^{-1}$          |
| $v_{\text{slide}}$                                   | sliding velocity of elastic sheaths relative to entoglossal process                                  | $\text{m s}^{-1}$          |
| $v_{\text{tongue}}$                                  | forward velocity of the soft tissue of the tongue                                                    | $\text{m s}^{-1}$          |
